# Supplementary material for: Diagnosing Solid Lesions in the Pancreas With Multimodal Artificial Intelligence: A Randomized Crossover Trial
Source: PubMed Central journal article supplement (PMC11259905; doi:10.1001/jamanetworkopen.2024.22454), 2024-07-19
Supplement: jamanetwopen-e2422454-s001.pdf [file jamanetwopen-e2422454-s001.pdf]

1 **Supplement 1. Trial protocol**

2 Protocol Title: An artificial intelligence model in EUS for diagnosing pancreatic cancer and other solid  
3 lesions

4 IRB Number: TJ-IRB20220467

5 PI: Bin Cheng

6 Approval date: 29-Apr-2022

7 **Table of Contents**

8 *1. Purpose* ..... 3

9 *2. Background* ..... 3

10 *3. The Retrospective Study Design* ..... 3

11     **3.1 Study design** ..... 3

12     **3.2 Study population**..... 4

13     **3.3 Inclusion criteria** ..... 4

14     **3.4 Exclusion criteria** ..... 4

15     **3.5 Diagnostic criteria** ..... 4

16 *4. The Retrospective Study Procedure*..... 5

17     **4.1 Data collection and preprocessing**..... 5

18     **4.2 Model development**..... 5

19     **4.3 Data analysis** ..... 5

20 *5. Outcomes of the Retrospective Study* ..... 6

21     **5.1 Primary outcomes**..... 6

22 *6. The Prospective Study Design* ..... 6

23     **6.1 Study design** ..... 6

24     **6.2 Study population**..... 6

25     **6.3 Inclusion criteria**..... 6

26     **6.4 Exclusion criteria** ..... 7

27     **6.5 Diagnostic criteria** ..... 7

28 *7. The Prospective Study Procedure*..... 7

29     **7.1 Screening** ..... 7

30     **7.2 Recruitment**..... 7

31     **7.3 Patient data collection and preprocessing** ..... 8

32     **7.4 Control group (Conventional diagnosis)** ..... 8

|    |                                                             |           |
|----|-------------------------------------------------------------|-----------|
| 33 | <b>7.5 Intervention group (AI-assisted diagnosis) .....</b> | <b>9</b>  |
| 34 | <b>7.6 Data collection of the crossover study .....</b>     | <b>9</b>  |
| 35 | <b>7.7 Data analysis .....</b>                              | <b>10</b> |
| 36 | <b>8. Outcomes of the Prospective Study .....</b>           | <b>10</b> |
| 37 | <b>8.1 Primary outcomes .....</b>                           | <b>10</b> |
| 38 | <b>9. Statistical Analysis Plan.....</b>                    | <b>11</b> |
| 39 | <b>9.1 Power and sample size calculation .....</b>          | <b>11</b> |
| 40 | <b>9.2 Analysis of results .....</b>                        | <b>11</b> |
| 41 | <b>10. Risks and Benefits .....</b>                         | <b>11</b> |
| 42 | <b>10.1 Risk to participants .....</b>                      | <b>11</b> |
| 43 | <b>10.2 Benefit to participants .....</b>                   | <b>11</b> |
| 44 | <b>11. Privacy and Confidentiality .....</b>                | <b>12</b> |
| 45 | <b>12. References .....</b>                                 | <b>12</b> |
| 46 |                                                             |           |
| 47 |                                                             |           |

## 48 **1. Purpose**

49 The purpose of this study is twofold: (1) To develop a multimodal AI model that integrates both clinical  
50 information and endoscopic ultrasound (EUS) images for the diagnosis of pancreatic solid lesions. The  
51 diagnostic performance of the model will be evaluated internally and externally. (2) To assess the AI  
52 model's potential to assist the diagnoses of endoscopists from varying levels of expertise in a prospective  
53 crossover trial.

54  
55 We hope to find out whether the diagnostic performance of the multimodal AI model will improve  
56 compared to the model that relies solely on the EUS images. We hope that the improved diagnostic  
57 performance will allow the multimodal AI model to demonstrate robust performance across various  
58 external datasets collected at different institutions. Moreover, we hope that the multimodal AI model will  
59 improve the diagnostic performance of endoscopists in the crossover study. In the future, the findings of  
60 this study can serve as the first step towards incorporating this AI model into the clinical workflow of  
61 diagnosing pancreatic solid lesions.

62

## 63 **2. Background**

64 Pancreatic cancer is a prevalent cause of pancreatic masses with an overall 5-year survival rate of  
65 approximately 10%.<sup>1</sup> Accurate diagnosis of pancreatic solid lesions is crucial for appropriate patient  
66 management. EUS has emerged as a valuable technique for diagnosing pancreatic lesions, but its  
67 specificity in discriminating carcinoma from non-cancerous masses is suboptimal, ranging from 50% to  
68 60%.<sup>2</sup> While artificial intelligence (AI) models such as convolutional neural network (CNN) have shown  
69 promise in differentiating pancreatic solid lesions in EUS images, prior studies predominantly lacked  
70 external validation and focused on a single modality.<sup>3-5</sup> Integrating multiple modalities, such as clinical  
71 information and EUS images, is expected to improve the robustness and accuracy of the diagnostic model  
72 and align better with real-world clinical practice, since in real-world medical context, the diagnosis is  
73 made after a comprehensive analysis of all the available clinical data.

74

## 75 **3. The Retrospective Study Design**

### 76 3.1 Study design

77 This is a retrospective, multi-center, diagnostic study.

78

79 3.2 Study population

80 We will include patients who underwent EUS procedures and received definite diagnosis of pancreatic  
81 solid lesions between January 2014 and December 2022 from four centers across China, including Wuhan  
82 Tongji Hospital (WHTJH), Nanjing Drum Tower Hospital (NJDTH), Peking Union Medical College  
83 Hospital (PUMCH), and Beijing Friendship Hospital (BJFH).

84

85 3.3 Inclusion criteria

- 86 1) Patients (aged  $\geq 18$  years) with pancreatic solid lesions  
87 2) The carcinoma (CA) lesions: pancreatic ductal adenocarcinoma (PDAC), acinar cell carcinoma  
88 (ACC), and pancreatic squamous cell carcinoma (SCC).  
89 3) The noncancerous lesions (Non-CA): pancreatic neuroendocrine tumor (pNET, Grade1 to Grade  
90 3), solid pseudopapillary tumor (SPT), autoimmune pancreatitis (AIP), chronic pancreatitis (CP),  
91 and tuberculosis.  
92 4) EUS equipment: EU-ME1 and EU-ME2 (Olympus Corporation, Tokyo, Japan) ultrasound  
93 systems equipped with either GF-UCT260 or GF-UCT240 curved linear echoendoscopes  
94 (Olympus Corporation, Tokyo, Japan).

95

96 3.4 Exclusion criteria

- 97 1) Aged  $< 18$  years  
98 2) Received surgery of pancreas prior to the EUS procedure  
99 3) Received chemotherapy, and radiotherapy because of pancreatic tumor prior to the EUS  
100 procedure.

101

102 3.5 Diagnostic criteria

- 103 1) PDAC, ACC, SCC, pNET, and SPT should be diagnosed pathologically by specimens obtained  
104 from EUS-FNA/B or surgery.  
105 2) AIP should be diagnosed according to the International Consensus Diagnostic Criteria (ICDC) for  
106 AIP.  
107 3) CP is diagnosed if there is neither malignancies detected in specimens acquired from EUS-  
108 FNA/B and/or surgery, nor a rapid progression of pancreatic diseases observed during the 6-

- 109 month follow-up period.
- 110 4) The diagnosis of tuberculosis will be based on a consensus reached through pathology,  
111 GeneXpert analysis, and the response to the anti-tuberculosis treatment.
- 112 5) Follow-up will be conducted for patients lack of following treatment and clinical outcomes.

113

## 114 **4. The Retrospective Study Procedure**

### 115 4.1 Data collection and preprocessing

- 116 1) Our team will collect the EUS images and clinical data, including personal history, clinical  
117 manifestations, medical history, laboratory tests, and radiology findings of the included patients.
- 118 2) The data collected at WHTJH will be used as training, validation, and testing datasets, while the  
119 data collected at NJDTH, PUMCH, and BJFH will be used as external testing datasets.
- 120 3) For EUS images, physician-captured still images and video-extracted images which can clearly  
121 present the pancreatic lesions will be selected. The preprocessing of the EUS images included  
122 removing the procedure-identifying information and poor-quality images resulting from the  
123 biopsy needle, annotation, and blurring.
- 124 4) According to the final diagnosis, the EUS images will be denoted as “0” for non-cancerous  
125 lesions and “1” for carcinoma lesions.

126

### 127 4.2 Model development

- 128 1) Model-1: This model is a CNN model trained with EUS images. The function of this model is to  
129 classify the pancreatic lesions into either CA or Non-CA according to the inputted EUS images.
- 130 2) Model-2: This model comprises multiple machine learning (ML) algorithms. This model will be  
131 trained with collected clinical information and will be used to select clinical features with critical  
132 diagnostic value.
- 133 3) Model-3: This model will combine the calculation results from the Model-1 and Model-2.  
134 Therefore, the function of Model-3 is to classify the pancreatic lesions into either CA or Non-CA  
135 based on EUS images and clinical features.

136

### 137 4.3 Data analysis

138 After the training of the AI models, the performance of the models will be evaluated in the internal testing  
139 and external testing datasets. The evaluation will be conducted in two phases: the image phase and the

140 patient phase.  
141 In the image phase, Model-1 will give the prediction based on the individual image, while Model-3 will  
142 give the prediction based on the individual image and the corresponding clinical features.  
143 In the patient phase, the predictions for each image of the patient (Model-1) or the predictions for each  
144 combination of image and clinical data of the patient (Model-3) will be aggregated to provide the final  
145 diagnosis of the given patient. The model's diagnostic performance will be assessed by comparing the  
146 predicted diagnosis with the actual classification (label) of the patient, and the performance metrics  
147 including accuracy, sensitivity, specificity, positive predictive value (PPV), negative predictive value  
148 (NPV), and area under the curve (AUC) will be calculated.  
149

## 150 **5. Outcomes of the Retrospective Study**

### 151 5.1 Primary outcomes

152 The diagnostic performance of AI models:

- 153 1) The internal dataset and external datasets (NJDTH, PUMCH, BJFH): evaluated by metrics  
154 including accuracy, sensitivity, specificity, NPV, PPV, and AUC

155

## 156 **6. The Prospective Study Design**

### 157 6.1 Study design

158 This is a prospective, dual-center, randomized, open-label, crossover trial

159

### 160 6.2 Study population

161 After the completion of the model training, consecutive patients who underwent EUS examinations and  
162 received a definite diagnosis of pancreatic lesions will be prospectively enrolled from two centers  
163 (WHTJH, PUMCH).

164

### 165 6.3 Inclusion criteria

- 166 1) Patients (aged  $\geq 18$  years) with pancreatic solid lesions and scheduled to receive EUS procedure.
- 167 2) Informed consent obtained.
- 168 3) The carcinoma (CA) lesions: pancreatic ductal adenocarcinoma (PDAC), acinar cell carcinoma  
169 (ACC), and pancreatic squamous cell carcinoma (SCC).
- 170 4) The noncancerous lesions (Non-CA): pancreatic neuroendocrine tumor (pNET, Grade1 to Grade  
171 3), solid pseudopapillary tumor (SPT), autoimmune pancreatitis (AIP), chronic pancreatitis (CP),

172 and tuberculosis.

173

#### 174 6.4 Exclusion criteria

175 1) Aged <18 years

176 2) Received surgery of pancreas prior to the EUS procedure

177 3) Received chemotherapy, and radiotherapy because of pancreatic tumor prior to the EUS  
178 procedure.

179

#### 180 6.5 Diagnostic criteria

181 1) PDAC, ACC, SCC, pNET, and SPT should be diagnosed pathologically by specimens obtained  
182 from EUS-FNA/B or surgery.

183 2) AIP should be diagnosed according to the International Consensus Diagnostic Criteria (ICDC) for  
184 AIP.

185 3) CP is diagnosed if there is neither malignancies detected in specimens acquired from EUS-  
186 FNA/B and/or surgery, nor a rapid progression of pancreatic diseases observed during the 6-  
187 month follow-up period.

188 4) The diagnosis of tuberculosis will be based on a consensus reached through pathology,  
189 GeneXpert analysis, and the response to the anti-tuberculosis treatment.

190 5) Follow-up will be conducted for patients lack of following treatment and clinical outcomes.

191

## 192 **7. The Prospective Study Procedure**

### 193 7.1 Screening

194 After completion of the model's training process, our team will screen for patients potentially meeting the  
195 inclusion criteria. Patients who are suspected of pancreatic solid lesions and scheduled to receive EUS  
196 procedures at WHTJH and PUMCH will be identified as potential candidates.

197

### 198 7.2 Recruitment

199 When eligible candidates are identified in the screening procedure, they will be approached by a member  
200 of our research team prior to their scheduled EUS procedure at WHTJH and PUMCH. The research team  
201 will explain the study objectives, procedures, and potential risks and benefits to the patients. Patients who

202 agree to participate in the study will be provided with an informed consent form to review. The research  
203 team will address any questions or concerns the patients may have about the study and the informed  
204 consent form. Patients who agree to participate in the study will be required to provide written informed  
205 consent. Upon obtaining the written consent, EUS images and clinical information of the patient who  
206 obtains a definite diagnosis will be collected and preprocessed as mentioned in the retrospective study  
207 procedure.

208  
209 For the crossover study, endoscopists of varying level of expertise will be recruited for the study,  
210 including experts (who annually performed at least 300 EUS procedures with over ten years of  
211 experience), senior endoscopists (who annually performed at least 150 EUS procedures with over five  
212 years of experience), and novices (with over one year of experience in EUS). The recruited endoscopists  
213 will be provided with a detailed explanation of the study objectives, procedures, and their roles in the  
214 study. In addition, the function and the diagnostic performance of the AI models will be described.

215  
216 According to the level of expertise, endoscopists will be randomly assigned in a 1:1 ratio to either the  
217 group that starts with AI assistance or the group that commences without AI assistance. After a washout  
218 period of at least two weeks, the endoscopists will switch groups and diagnose the same set of patients  
219 using the alternate approach (AI-assisted or conventional).

220

### 221 7.3 Patient data collection and preprocessing

222 As mentioned in the retrospective study procedure, the clinical information and EUS images will be  
223 collected from the patients who received definite diagnosis for their pancreatic solid lesions.

- 224 1) Clinical data, including personal history, clinical manifestations, medical history, laboratory tests,  
225 and radiology findings will be documented.
- 226 2) Physician-captured still images and video-extracted images that can clearly present the pancreatic  
227 lesions will be selected.
- 228 3) The preprocessing of the EUS images included removing the procedure-identifying information  
229 and poor-quality images resulted from biopsy needle, annotation and blurring.
- 230 4) None of the endoscopists in the crossover study will participate in this process, and they will all  
231 be masked to the personal information, EUS reports, pathological results, and clinical diagnosis  
232 of the involved patients.

233  
234 7.4 Control group (Conventional diagnosis)

235 Endoscopists in the control group will only be provided with EUS images and clinical information. Two



236 diagnoses are required to be made. 1) Diagnosis-1: Endoscopists are required to make this diagnosis  
237 according to the EUS images only. 2) Diagnosis-2: Endoscopists are required to make this diagnosis  
238 based on both EUS images and clinical information.

239  
240 Endoscopists will be required to classify each pancreatic lesion as either cancerous (CA) or non-  
241 cancerous (Non-CA). While the primary requirement is to provide this binary classification, endoscopists  
242 will have the option to offer a more specific diagnosis (e.g., PDAC, pNET, AIP, CP, SPT, etc.) if they  
243 feel confident in doing so.

244  
245 Endoscopists will document their diagnoses using a standardized online form. The form will include  
246 fields for the binary CA/Non-CA classification, as well as an optional field for the specific diagnosis.

247  
248 7.5 Intervention group (AI-assisted diagnosis)

249 Endoscopists in the intervention group will have access to the predictions of AI models when making  
250 their first diagnoses. Next, interpretability analyses, including gradient-weighted class activation mapping  
251 (Grad-CAM) and Shapley additive explanations (SHAP) algorithms will be provided to endoscopists.  
252 With the predictions given by the AI models and the interpretability analyses, endoscopists will be  
253 required to make the second diagnosis on the same set of patients.

254  
255 For each patient, the endoscopists will be provided with the EUS images and clinical information  
256 alongside the given predictions. They are only required to classify the pancreatic lesion into either CA or  
257 Non-CA, while they can give the specific classification. Endoscopists will document their diagnoses in a  
258 standardized online form which will include fields for the binary CA/Non-CA classification, as well as an  
259 optional field for the specific diagnosis.

260  
261 7.6 Data collection of the crossover study

262 The diagnoses made by endoscopists will be collected from the standardized online forms which the  
263 endoscopists finished in both the intervention and the control group.

264  
265 At the end of the crossover study, a questionnaire will be sent to the endoscopists, asking the impact of  
266 the AI models on their decision-making process and their preference to the AI models.

267

268 7.7 Data analysis

269 We will analyze the diagnostic performance of each endoscopist with or without the AI assistance. The  
270 diagnostic performance of AI models in the prospective dataset will be analyzed. We will compare the  
271 diagnostic performance of AI models with endoscopists from different level of expertise. The rate of  
272 endoscopist from different level of expertise rejecting the AI-assistance will be analyzed. The impact of  
273 the AI models on the decision-making process and the endoscopists' preference for the AI models will be  
274 analyzed. The rejection rate of the endoscopists with or without the interpretability analyses will be  
275 compared.

276

277 **8. Outcomes of the Prospective Study**

278 8.1 Primary outcomes

279 The diagnostic performance of endoscopists with or without the AI-assistance

- 280 1) Measured by metrics including sensitivity, specificity, accuracy, positive predictive value (PPV),  
281 negative predictive value (NPV), and area under the curve (AUC)

282

283 8.2 Secondary outcomes

- 284 1) The diagnostic performance of AI models in the prospective dataset

285 a. Measured by metrics including sensitivity, specificity, accuracy, positive predictive value  
286 (PPV), negative predictive value (NPV), and area under the curve (AUC)

- 287 2) The impact of AI models on the decision-making process of endoscopists

288 a. The impact will be scored by endoscopists in the questionnaire at the end of the study

- 289 3) Endoscopists' preference for AI models

290 a. This will be scored by endoscopists in the questionnaire at the end of the study

- 291 4) The rejection rate of the expert and senior endoscopists with or without the interpretability  
292 analysis

293 a. The total rejection rate (TRR) is defined as the proportion of cases in which expert and  
294 senior endoscopists disagree with the predictions of AI models. It will be calculated as  
295 follows:

296 
$$\text{TRR} = (\text{Number of cases where endoscopists disagree with the the predictions of AI models}) / (\text{Total number of cases})$$

297  
298 b. The false rejection rate (FRR) is defined as the proportion of cases in which expert and  
299 senior endoscopists incorrectly reject the predictions of AI models. It will be calculated  
300 as follows:

301 FRR = (Number of cases where endoscopists incorrectly reject the predictions of AI  
302 models) / (Total number of cases where endoscopists disagree with the predictions of AI  
303 models)  
304

## 305 **9. Statistical Analysis Plan**

### 306 9.1 Power and sample size calculation

307 The sample size is calculated based on the primary hypothesis which is the diagnostic performance of  
308 novices improved significantly with AI assistance. We anticipate that the diagnostic accuracy of the AI  
309 model in the prospective dataset to be 88% and the accuracy of novices is 72% based on previous results.  
310 The estimated sample size was 126 with a type 1 error rate of 0.05 and power of 0.90. We slightly  
311 enlarged the sample size to 150.

312

### 313 9.2 Analysis of results

314 The primary outcome, the diagnostic performance of endoscopists with or without the AI-assistance will  
315 be evaluated by metrics including accuracy, sensitivity, specificity, positive predictive value (PPV),  
316 negative predictive value (NPV), and area under the curve (AUC). The McNemar test will be used to  
317 compare the accuracy, sensitivity, and specificity. Generalized score statistics will be utilized to compare  
318 the PPV and NPV. The optimal cutoff value of the receiver operating characteristic (ROC) curve is  
319 determined when the Youden Index is maximized. A Wilcoxon matched-pairs signed rank test will be  
320 used to compare the impact of models on the diagnosis of endoscopists. Chi-square analysis will be used  
321 to compare the rejection rate of endoscopists with or without interpretability analyses and endoscopists'  
322 preferences for the AI models. A two-sided p-value less than 0.05 is considered statistically significant.

323

## 324 **10. Risks and Benefits**

### 325 10.1 Risk to participants

326 This study poses negligible risk to its participants, with only EUS images and clinical information  
327 collected. In addition, during the data collection process, patient's personal information will not be  
328 collected and the data will be securely stored within our research team.

329

### 330 10.2 Benefit to participants

331 There is no direct benefit to its participants. However, in the future, we hope the findings of this study can  
332 serve as the first step towards incorporating this AI model into the clinical workflow, improving the

333 clinical management for the patients with pancreatic solid lesions.

334

## 335 **11. Privacy and Confidentiality**

336 Only EUS images and clinical information will be collected from the patients and personal information  
337 will not be collected. Data will be securely stored within our research team.

338 During the crossover study, endoscopists will only receive the EUS images and clinical information of the  
339 patient without any personal information or procedure identifying information.

340

## 341 **12. References**

342

- 343 1. Cai J, Chen H, Lu M, et al. Advances in the epidemiology of pancreatic cancer: Trends,  
344 risk factors, screening, and prognosis. *Cancer Lett.* Nov 1 2021;520:1-11.  
345 doi:10.1016/j.canlet.2021.06.027
- 346 2. Giovannini M. The place of endoscopic ultrasound in bilio-pancreatic pathology.  
347 *Gastroentérologie Clinique et Biologique.* 2010;34(8-9):436-445. doi:10.1016/j.gcb.2010.05.004
- 348 3. Marya NB, Powers PD, Chari ST, et al. Utilisation of artificial intelligence for the  
349 development of an EUS-convolutional neural network model trained to enhance the diagnosis of  
350 autoimmune pancreatitis. *Gut.* Jul 2021;70(7):1335-1344. doi:10.1136/gutjnl-2020-322821
- 351 4. Tonzuka R, Itoi T, Nagata N, et al. Deep learning analysis for the detection of  
352 pancreatic cancer on endosonographic images: a pilot study. *J Hepatobiliary Pancreat Sci.* Jan  
353 2021;28(1):95-104. doi:10.1002/jhbp.825
- 354 5. Udriștoiu AL, Cazacu IM, Gruionu LG, et al. Real-time computer-aided diagnosis of  
355 focal pancreatic masses from endoscopic ultrasound imaging based on a hybrid convolutional  
356 and long short-term memory neural network model. *PLoS One.* 2021;16(6):e0251701.  
357 doi:10.1371/journal.pone.0251701
- 358
