# Supplementary material for: Diagnosing Solid Lesions in the Pancreas With Multimodal Artificial Intelligence: A Randomized Crossover Trial
Source: PubMed Central journal article supplement (PMC11259905; doi:10.1001/jamanetworkopen.2024.22454), 2024-07-19
Supplement: jamanetwopen-e2422454-s003.pdf [file jamanetwopen-e2422454-s003.pdf]

## Data Sharing Statement

Cui. Diagnosing Solid Lesions in the Pancreas With Multimodal Artificial Intelligence. *JAMA Netw Open*. Published July 19, 2024. doi:10.1001/jamanetworkopen.2024.22454

### Data

**Data available:** Yes

**Data types:** Deidentified participant data

**How to access data:** [b.cheng@tjh.tjmu.edu.cn](mailto:b.cheng@tjh.tjmu.edu.cn).

**When available:** With publication

### Supporting Documents

**Document types:** None

### Additional Information

**Who can access the data:** Researchers whose proposed use of the data has been approved

**Types of analyses:** For a specified purpose

**Mechanisms of data availability:** with a signed data access agreement
